# Supplementary material for: A DNA topoisomerase IB in Thaumarchaeota testifies for the presence of this enzyme in the last common ancestor of Archaea and Eucarya
Source: Springer Nature journal article supplement (doi:10.1186/1745-6150-3-54), 2008-01-01
Supplement: Additional file 3 [file 1745-6150-3-54-s3.pdf]

**Topoisomerase IB**

**Topoisomerase IA**

**Taxonomy**

Archaeal type

Topoisomerase III

Reverse gyrase

Bacterial type

**ARCHAEA**

**Crenarchaeota**

- Aeropyrum pernix* K1
- Caldivirga maquilingensis* IC-167
- Hyperthermus butylicus* DSM 5456
- Ignicoccus hospitalis* KIN4/I
- Metallosphaera sedula* DSM 5348
- Pyrobaculum aerophilum* str. IM2
- Pyrobaculum arsenaticum* DSM 13514
- Pyrobaculum caldifontis* JCM 11548
- Pyrobaculum islandicum* DSM 4184
- Staphylothermus marinus* F1
- Sulfolobus acidocaldarius* DSM 639
- Sulfolobus solfataricus* P2
- Sulfolobus tokodaii* str. 7
- Thermofilum pendens* Hrk 5
- Thermoproteus neutrophilus* V24Sta

NP\_148170

YP\_001539953

YP\_001013109

YP\_001434598

NP\_560414

YP\_001153574

YP\_001056006

YP\_929913

YP\_001041270

YP\_255998

NP\_342400

NP\_377148

YP\_920289

YP\_001795099

NP\_147880, NP\_147906

YP\_001540636

YP\_001012435, YP\_001013124

YP\_001435008, YP\_001435105

YP\_001191827, YP\_001192298

NP\_559079

YP\_001152524

YP\_001055584

YP\_930753

YP\_001040974, YP\_001041125

YP\_255499

NP\_341957, NP\_342447

NP\_376245, NP\_377224

YP\_919983

YP\_001793605

YP\_001190937

Desulfurococcales

Thermoproteales

Desulfurococcales

Desulfurococcales

Sulfolobales

Thermoproteales

Thermoproteales

Thermoproteales

Thermoproteales

Desulfurococcales

Sulfolobales

Sulfolobales

Sulfolobales

Thermoproteales

Thermoproteales

**Korarchaeota**

- Korarchaeum thermofilum* OPF8

YP\_001736678

YP\_001737502

**Thaumarchaeota**

- Nitrosopumilus maritimus* SCM1
- Cenarchaeum symbiosum*

YP\_001582656

YP\_875131

Nitrosopumilales

Cenarchaeales

**Euryarchaeota**

- Archaeoglobus fulgidus* DSM 4304
- Candidatus Methanoregula boonei* 6A8
- Haloarcula marismortui* ATCC 43049
- Halobacterium* sp. NRC-1
- Halobacterium salinarum* R1
- Haloquadratum walsbyi* DSM 16790
- Methanobrevibacter smithii* ATCC 35061
- Methanocaldococcus jannaschii* DSM 2661
- Methanococcoides burtonii* DSM 6242
- Methanococcus aeolicus* Nankai-3
- Methanococcus maripaludis* C5
- Methanococcus maripaludis* C6
- Methanococcus maripaludis* C7
- Methanococcus maripaludis* S2
- Methanococcus vannielii* SB
- Methanocorpusculum labreanum* Z
- Methanoculleus marisnigri* JR1
- Methanopyrus kandleri* AV19
- Methanosaeta thermophila* PT
- Methanosarcina acetivorans* C2A
- Methanosarcina barkeri* str. Fusaro
- Methanosarcina mazei* Go1
- Methanosphaera stadtmanae* DSM 3091
- Methanospirillum hungatei* JF-1
- Methanothermobacter thermautotrophicus* str. Delta H
- Natronomonas pharaonis* DSM 2160

NP\_070633

YP\_001404020

YP\_136265

NP\_444190

YP\_001688526

YP\_657047

YP\_001273290

NP\_248662

YP\_564864, YP\_565420

YP\_001324231

YP\_001097306

YP\_001549743

YP\_001329424

NP\_988076

YP\_001322681

YP\_001030575

YP\_001046685

NP\_614887

YP\_843026

NP\_616715, NP\_617416

YP\_305639, YP\_305910

NP\_632207, NP\_635100

YP\_447412

YP\_502480

NP\_276736

YP\_326271

NP\_069857

NP\_248519

NP\_613576

Archaeoglobales

Methanomicrobiales

Halobacteriales

Halobacteriales

Halobacteriales

Halobacteriales

Methanobacteriales

Methanococcales

Methanosarcinales

Methanococcales

Methanococcales

Methanococcales

Methanococcales

Methanococcales

Methanococcales

Methanomicrobiales

Methanomicrobiales

Methanopyrales

Methanosarcinales

Methanosarcinales

Methanosarcinales

Methanosarcinales

Methanobacteriales

Methanomicrobiales

Methanobacteriales

Halobacteriales

*Picrophilus torridus* DSM 9790  
*Pyrococcus abyssi* GE5  
*Pyrococcus furiosus* DSM 3638  
*Pyrococcus horikoshii* OT3  
*Thermococcus kodakarensis* KOD1  
*Thermoplasma acidophilum* DSM 1728  
*Thermoplasma volcanium* GSS1  
uncultured methanogenic archaeon RC-I

|  |                      |  |  |           |                   |
|--|----------------------|--|--|-----------|-------------------|
|  | YP_023525            |  |  |           | Thermoplasmatales |
|  | NP_127104            |  |  | NP_126943 | Thermococcales    |
|  | NP_578223            |  |  | NP_578224 | Thermococcales    |
|  | NP_142581            |  |  | NP_142736 | Thermococcales    |
|  | YP_183504            |  |  | YP_182883 | Thermococcales    |
|  | NP_393542            |  |  |           | Thermoplasmatales |
|  | NP_110538            |  |  |           | Thermoplasmatales |
|  | YP_686736, YP_686844 |  |  |           |                   |

**Nanoarchaeota**

*Nanoarchaeum equitans* Kin4-M

|  |           |  |  |           |  |
|--|-----------|--|--|-----------|--|
|  | NP_963339 |  |  | NP_963605 |  |
|--|-----------|--|--|-----------|--|

**BACTERIA**

**Acidobacteria**

*Acidobacteria bacterium* Ellin345  
*Solibacter usitatus* Ellin6076

|           |           |  |           |  |                   |
|-----------|-----------|--|-----------|--|-------------------|
|           | YP_592415 |  |           |  | Acidobacteriaceae |
| YP_821734 | YP_823673 |  | YP_828915 |  | Solibacteraceae   |

**Actinobacteria**

*Acidothermus cellulolyticus* 11B  
*Arthrobacter aureus* TC1  
*Arthrobacter* sp. FB24  
*Bifidobacterium adolescentis* ATCC 15703  
*Bifidobacterium longum* NCC2705  
*Clavibacter michiganensis* subsp. *michiganensis* NCPPB 382  
*Clavibacter michiganensis* subsp. *Sepedonicus*  
*Corynebacterium diphtheriae* NCTC 13129  
*Corynebacterium efficiens* YS-314  
*Corynebacterium glutamicum* ATCC 13032  
*Corynebacterium glutamicum* ATCC 13032  
*Corynebacterium glutamicum* R  
*Corynebacterium jeikeium* K411  
*Corynebacterium urealyticum* DSM 7109  
*Frankia alni* ACN14a  
*Frankia* sp. Ccl3  
*Frankia* sp. EAN1pec  
*Kineococcus radiotolerans* SRS30216  
*Leifsonia xyli* subsp. *xyli* str. CTCB07  
*Mycobacterium abscessus*  
*Mycobacterium avium* 104  
*Mycobacterium avium* subsp. *paratuberculosis* K-10  
*Mycobacterium bovis* AF2122/97  
*Mycobacterium bovis* BCG str. Pasteur 1173P2  
*Mycobacterium gilvum* PYR-GCK  
*Mycobacterium leprae* TN  
*Mycobacterium smegmatis* str. MC2 155  
*Mycobacterium* sp. JLS  
*Mycobacterium* sp. KMS  
*Mycobacterium* sp. MCS  
*Mycobacterium tuberculosis* CDC1551  
*Mycobacterium tuberculosis* F11  
*Mycobacterium tuberculosis* H37Ra  
*Mycobacterium tuberculosis* H37Rv  
*Mycobacterium ulcerans* Agy99  
*Mycobacterium vanbaalenii* PYR-1

|              |              |  |           |  |                    |
|--------------|--------------|--|-----------|--|--------------------|
|              | YP_873730    |  |           |  | Frankineae         |
| YP_946110    | YP_949030    |  |           |  | Micrococcineae     |
| YP_832570    | YP_832830    |  |           |  | Micrococcineae     |
|              | YP_909024    |  |           |  | Bifidobacteriaceae |
|              | NP_695678    |  | NP_696628 |  | Bifidobacteriaceae |
| YP_001223364 | YP_001221668 |  |           |  | Micrococcineae     |
| YP_001709063 | YP_001708973 |  |           |  | Micrococcineae     |
|              | NP_938715    |  |           |  | Corynebacterineae  |
|              | NP_736917    |  |           |  | Corynebacterineae  |
|              | NP_599561    |  |           |  | Corynebacterineae  |
|              | YP_224609    |  |           |  | Corynebacterineae  |
|              | YP_001137261 |  |           |  | Corynebacterineae  |
|              | YP_251753    |  |           |  | Corynebacterineae  |
|              | YP_001801242 |  |           |  | Corynebacterineae  |
| YP_714104    | YP_716706    |  |           |  | Frankineae         |
|              | YP_483380    |  |           |  | Frankineae         |
|              | YP_001504681 |  |           |  | Frankineae         |
|              | YP_001360241 |  |           |  | Frankineae         |
|              | YP_061514    |  |           |  | Micrococcineae     |
| YP_001703237 | YP_001701242 |  |           |  | Corynebacterineae  |
|              | YP_879799    |  |           |  | Corynebacterineae  |
| NP_962178    | NP_959359    |  |           |  | Corynebacterineae  |
|              | NP_857309    |  |           |  | Corynebacterineae  |
|              | YP_979783    |  |           |  | Corynebacterineae  |
| YP_001133235 | YP_001132664 |  |           |  | Corynebacterineae  |
|              | NP_301268    |  |           |  | Corynebacterineae  |
| YP_886157    | YP_890377    |  |           |  | Corynebacterineae  |
| YP_001069601 | YP_001073437 |  |           |  | Corynebacterineae  |
| YP_937298    | YP_940862    |  |           |  | Corynebacterineae  |
| YP_638447    | YP_641956    |  |           |  | Corynebacterineae  |
|              | NP_338295    |  |           |  | Corynebacterineae  |
|              | YP_001289602 |  |           |  | Corynebacterineae  |
|              | YP_001285032 |  |           |  | Corynebacterineae  |
|              | NP_218163    |  |           |  | Corynebacterineae  |
|              | YP_907724    |  |           |  | Corynebacterineae  |
| YP_955527    | YP_956173    |  |           |  | Corynebacterineae  |

*Nocardia farcinica* IFM 10152  
*Nocardioides* sp. JS614  
*Propionibacterium acnes* KPA171202  
*Renibacterium salmoninarum* ATCC 33209  
*Rhodococcus* sp. RHA1  
*Rubrobacter xylanophilus* DSM 9941  
*Saccharopolyspora erythraea* NRRL 2338  
*Salinispora arenicola* CNS-205  
*Salinispora tropica* CNB-440  
*Streptomyces avermitilis* MA-4680  
*Streptomyces coelicolor* A3(2)  
*Thermobifida fusca* YX  
*Tropheryma whippelii* str. Twist  
*Tropheryma whippelii* TW08/27

|              |              |           |                     |
|--------------|--------------|-----------|---------------------|
| YP_119639    | YP_116573    |           | Corynebacterineae   |
| YP_921940    | YP_921608    |           | Propionibacterineae |
|              | YP_054960    |           | Propionibacterineae |
|              | YP_001625873 |           | Micrococceae        |
|              | YP_704301    |           | Corynebacterineae   |
|              | YP_644723    | YP_643532 | Rubrobacterineae    |
|              | YP_001102651 |           | Pseudonocardineae   |
| YP_001536631 | YP_001539176 |           | Micromonosporineae  |
| YP_001158608 | YP_001160835 |           | Micromonosporineae  |
|              | NP_825798    |           | Streptomycineae     |
|              | NP_627741    |           | Streptomycineae     |
|              | YP_290840    |           | Streptosporangineae |
|              | NP_787824    |           | Micrococceae        |
|              | NP_789636    |           | Micrococceae        |

### Aquificae

*Aquifex aeolicus* VF5

|  |           |                      |              |
|--|-----------|----------------------|--------------|
|  | NP_213453 | NP_213599, NP_213790 | Aquificaceae |
|--|-----------|----------------------|--------------|

### Bacteroidetes/Chlorobi

*Bacteroides fragilis* NCTC 9343  
*Bacteroides fragilis* YCH46  
*Bacteroides thetaiotaomicron* VPI-5482  
*Bacteroides vulgatus* ATCC 8482  
*Candidatus Sulcia muelleri* GWSS  
*Chlorobium chlorochromatii* CaD3  
*Chlorobium phaeobacteroides* DSM 266  
*Chlorobium tepidum* TLS  
*Cytophaga hutchinsonii* ATCC 33406  
*Flavobacterium johnsoniae* UW101  
*Flavobacterium psychrophilum* JIP02/86  
*Gramella forsetii* KT0803  
*Parabacteroides distasonis* ATCC 8503  
*Pelodictyon luteolum* DSM 273  
*Porphyromonas gingivalis* W83  
*Prosthecochloris vibrioformis* DSM 265  
*Salinibacter ruber* DSM 13855

|              |              |                                            |                    |
|--------------|--------------|--------------------------------------------|--------------------|
|              | YP_213781    | YP_213185, YP_210918, YP_211372            | Bacteroidales      |
|              | YP_101691    | YP_101074, YP_098658, YP_097427            | Bacteroidales      |
|              | NP_811739    | NP_811002, NP_809018, NP_811237, NP_811557 | Bacteroidales      |
|              | YP_001298646 | YP_001299249, YP_001298037, YP_001298832   | Bacteroidales      |
|              | YP_378397    |                                            | Flavobacteriales   |
|              | YP_910603    |                                            | Chlorobiales       |
|              | NP_660961    |                                            | Chlorobiales       |
| YP_678894    | YP_678943    | YP_680178                                  | Sphingobacteriales |
| YP_001195701 | YP_001194202 | YP_001194635, YP_001195361                 | Flavobacteriales   |
|              | YP_001296841 |                                            | Flavobacteriales   |
| YP_861935    | YP_863029    |                                            | Flavobacteriales   |
|              | YP_001304919 | YP_001303061                               | Bacteroidales      |
|              | YP_375958    |                                            | Chlorobiales       |
|              | NP_905022    | NP_904451, NP_905641                       | Bacteroidales      |
|              | YP_001131226 |                                            | Chlorobiales       |
|              | YP_445245    |                                            | Sphingobacteriales |

### PVC

*Candidatus Protochlamydia amoebophila* UWE25  
*Chlamydia muridarum* Nigg  
*Chlamydia trachomatis* 434/Bu  
*Chlamydia trachomatis* A/HAR-13  
*Chlamydia trachomatis* D/UW-3/CX  
*Chlamydia trachomatis* L2b/UCH-1/proctitis  
*Chlamydomphila abortus* S26/3  
*Chlamydomphila caviae* GPIC  
*Chlamydomphila felis* Fe/C-56  
*Chlamydomphila pneumoniae* AR39  
*Chlamydomphila pneumoniae* CWL029  
*Chlamydomphila pneumoniae* J138  
*Chlamydomphila pneumoniae* TW-183  
*Rhodopirellula baltica* SH 1

|           |              |  |                   |
|-----------|--------------|--|-------------------|
| YP_008181 | YP_007070    |  | Parachlamydiaceae |
|           | NP_296396    |  | Chlamydiaceae     |
|           | YP_001654102 |  | Chlamydiaceae     |
|           | YP_328468    |  | Chlamydiaceae     |
|           | NP_220161    |  | Chlamydiaceae     |
|           | YP_001653114 |  | Chlamydiaceae     |
|           | YP_220342    |  | Chlamydiaceae     |
|           | NP_829849    |  | Chlamydiaceae     |
|           | YP_514942    |  | Chlamydiaceae     |
|           | NP_445640    |  | Chlamydiaceae     |
|           | NP_224964    |  | Chlamydiaceae     |
|           | NP_300826    |  | Chlamydiaceae     |
|           | NP_877069    |  | Chlamydiaceae     |
|           | NP_868117    |  | Planctomycetales  |

### Chloroflexi

*Chloroflexus aurantiacus* J-10-fl  
*Dehalococcoides ethenogenes* 195

|  |              |  |                 |
|--|--------------|--|-----------------|
|  | YP_001637483 |  | Chloroflexaceae |
|  | YP_181458    |  | Dehalococcoides |

|                                             |              |  |                    |
|---------------------------------------------|--------------|--|--------------------|
| <i>Dehalococcoides</i> sp. BAV1             | YP_001214115 |  | Dehalococcoides    |
| <i>Dehalococcoides</i> sp. CBDB1            | YP_307755    |  | Dehalococcoides    |
| <i>Herpetosiphon aurantiacus</i> ATCC 23779 | YP_001547149 |  | Herpetosiphonaceae |
| <i>Roseiflexus castenholzii</i> DSM 13941   | YP_001431800 |  | Chloroflexaceae    |
| <i>Roseiflexus</i> sp. RS-1                 | YP_001275778 |  | Chloroflexaceae    |

### Cyanobacteria

|                                                                     |                                          |  |                    |
|---------------------------------------------------------------------|------------------------------------------|--|--------------------|
| <i>Acaryochloris marina</i> MBIC11017                               | YP_001516372, YP_001519161, YP_001521896 |  | unclassified       |
| <i>Anabaena variabilis</i> ATCC 29413                               | YP_320551, YP_324284                     |  | Nostocaceae        |
| <i>Cyanothece</i> sp. ATCC 51142                                    | YP_001802651, YP_001806222               |  | Chroococcales      |
| <i>Gloeobacter violaceus</i> PCC 7421                               | NP_923966, NP_926144                     |  | Gloeobacteriales   |
| <i>Microcystis aeruginosa</i> NIES-843                              | YP_001660677                             |  | Microcystis        |
| <i>Nostoc</i> sp. PCC 7120                                          | NP_486671, NP_486820                     |  | Nostocaceae        |
| <i>Prochlorococcus marinus</i> str. AS9601                          | YP_001008886                             |  | Prochlorococcaceae |
| <i>Prochlorococcus marinus</i> str. MIT 9211                        | YP_001550318                             |  | Prochlorococcaceae |
| <i>Prochlorococcus marinus</i> str. MIT 9215                        | YP_001483717                             |  | Prochlorococcaceae |
| <i>Prochlorococcus marinus</i> str. MIT 9301                        | YP_001090684                             |  | Prochlorococcaceae |
| <i>Prochlorococcus marinus</i> str. MIT 9303                        | YP_001016647                             |  | Prochlorococcaceae |
| <i>Prochlorococcus marinus</i> str. MIT 9312                        | YP_396932                                |  | Prochlorococcaceae |
| <i>Prochlorococcus marinus</i> str. MIT 9313                        | NP_895180                                |  | Prochlorococcaceae |
| <i>Prochlorococcus marinus</i> str. MIT 9515                        | YP_001010814                             |  | Prochlorococcaceae |
| <i>Prochlorococcus marinus</i> str. NATL1A                          | YP_001014318                             |  | Prochlorococcaceae |
| <i>Prochlorococcus marinus</i> str. NATL2A                          | YP_292959                                |  | Prochlorococcaceae |
| <i>Prochlorococcus marinus</i> subsp. <i>marinus</i> str. CCMP1375  | NP_874826                                |  | Prochlorococcaceae |
| <i>Prochlorococcus marinus</i> subsp. <i>pastoris</i> str. CCMP1986 | NP_892554                                |  | Prochlorococcaceae |
| <i>Synechococcus elongatus</i> PCC 6301                             | YP_170849                                |  | Chroococcales      |
| <i>Synechococcus elongatus</i> PCC 7942                             | YP_400433                                |  | Chroococcales      |
| <i>Synechococcus</i> sp. CC9311                                     | YP_731316                                |  | Chroococcales      |
| <i>Synechococcus</i> sp. CC9605                                     | YP_380926                                |  | Chroococcales      |
| <i>Synechococcus</i> sp. CC9902                                     | YP_377766                                |  | Chroococcales      |
| <i>Synechococcus</i> sp. JA-2-3B'a(2-13)                            | YP_478560                                |  | Chroococcales      |
| <i>Synechococcus</i> sp. JA-3-3Ab                                   | YP_474040                                |  | Chroococcales      |
| <i>Synechococcus</i> sp. PCC 7002                                   | YP_001735778                             |  | Chroococcales      |
| <i>Synechococcus</i> sp. RCC307                                     | YP_001226916                             |  | Chroococcales      |
| <i>Synechococcus</i> sp. WH 7803                                    | YP_001225606                             |  | Chroococcales      |
| <i>Synechococcus</i> sp. WH 8102                                    | NP_897963                                |  | Chroococcales      |
| <i>Synechocystis</i> sp. PCC 6803                                   | NP_441184                                |  | Chroococcales      |
| <i>Thermosynechococcus elongatus</i> BP-1                           | NP_682671                                |  | Chroococcales      |
| <i>Trichodesmium erythraeum</i> IMS101                              | YP_720023                                |  | Oscillatoriales    |

### Deinococcus-Thermus

|                                           |           |           |           |               |
|-------------------------------------------|-----------|-----------|-----------|---------------|
| <i>Deinococcus geothermalis</i> DSM 11300 | YP_605521 | YP_605464 |           | Deinococcales |
| <i>Deinococcus radiodurans</i> R1         | NP_294413 | NP_295097 |           | Deinococcales |
| <i>Thermus thermophilus</i> HB27          |           | YP_005900 |           | Thermales     |
| <i>Thermus thermophilus</i> HB8           |           | YP_143340 | YP_145411 | Thermales     |

### Firmicutes

|                                                      |              |                                 |  |               |
|------------------------------------------------------|--------------|---------------------------------|--|---------------|
| <i>Alkaliphilus metalliredigens</i> QYMF             | YP_001320545 | YP_001321135, YP_001319011      |  | Clostridiales |
| <i>Alkaliphilus oremlandii</i> OhLAs                 | YP_001513014 | YP_001513687, YP_001512577      |  | Clostridiales |
| <i>Acholeplasma laidlawii</i> PG-8A                  | YP_001620337 |                                 |  | Mollicutes    |
| <i>Aster yellows witches'-broom phytoplasma</i> AYWB | YP_456638    |                                 |  | Mollicutes    |
| <i>Bacillus amyloliquefaciens</i> FZB42              | YP_001421189 | YP_001420078                    |  | Bacillales    |
| <i>Bacillus anthracis</i> str. Ames                  | NP_846214    | NP_844316, NP_842919            |  | Bacillales    |
| <i>Bacillus anthracis</i> str. 'Ames Ancestor'       | YP_020610    | YP_018548, YP_016995, YP_022474 |  | Bacillales    |
| <i>Bacillus anthracis</i> str. Sterne                | YP_029935    | YP_028031, YP_026641            |  | Bacillales    |

|                                                                        |              |                                                                      |                 |
|------------------------------------------------------------------------|--------------|----------------------------------------------------------------------|-----------------|
| <i>Bacillus cereus</i> ATCC 10987                                      | NP_980172    | NP_978300, NP_976812, NP_982147                                      | Bacillales      |
| <i>Bacillus cereus</i> ATCC 14579                                      | NP_833552    | NP_831605, NP_830256                                                 | Bacillales      |
| <i>Bacillus cereus</i> E33L                                            | YP_085174    | YP_083320, YP_081956                                                 | Bacillales      |
| <i>Bacillus cereus</i> subsp. <i>cytotoxis</i> NVH 391-98              | YP_001375716 | YP_001374784, YP_001373711                                           | Bacillales      |
| <i>Bacillus clausii</i> KSM-K16                                        | YP_175774    | YP_177445, YP_175615                                                 | Bacillales      |
| <i>Bacillus halodurans</i> C-125                                       | NP_243333    | NP_244253                                                            | Bacillales      |
| <i>Bacillus licheniformis</i> ATCC 14580                               | YP_079005    | YP_077752                                                            | Bacillales      |
| <i>Bacillus licheniformis</i> ATCC 14580                               | YP_091420    | YP_090167                                                            | Bacillales      |
| <i>Bacillus pumilus</i> SAFR-032                                       | YP_001486753 | YP_001485655                                                         | Bacillales      |
| <i>Bacillus subtilis</i> subsp. <i>subtilis</i> str. 168               | NP_389494    | NP_388307                                                            | Bacillales      |
| <i>Bacillus thuringiensis</i> serovar <i>konkukian</i> str. 97-27      | YP_037894    | YP_036076, YP_034701, YP_173315, YP_035921                           | Bacillales      |
| <i>Bacillus thuringiensis</i> str. <i>Al Hakam</i>                     | YP_896206    | YP_894518, YP_893279                                                 | Bacillales      |
| <i>Bacillus weihenstephanensis</i> KBAB4                               | YP_001646455 | YP_001644629, YP_001643250, YP_001642732                             | Bacillales      |
| <i>Caldicellulosiruptor saccharolyticus</i> DSM 8903                   | YP_001180043 |                                                                      | Clostridiales   |
| <i>Carboxydotherrmus hydrogenofrans</i> Z-2901                         | YP_360614    |                                                                      | Clostridiales   |
| <i>Clostridium acetobutylicum</i> ATCC 824                             | NP_348410    | NP_350150, NP_349549                                                 | Clostridiales   |
| <i>Candidatus Desulfurudis audaxviator</i> MP104C                      | YP_001716766 |                                                                      | Clostridiales   |
| <i>Clostridium beijerinckii</i> NCIMB 8052                             | YP_001308324 | YP_001309000, YP_001308008                                           | Clostridiales   |
| <i>Clostridium botulinum</i> A str. ATCC 19397                         | YP_001384612 | YP_001383644, YP_001383854                                           | Clostridiales   |
| <i>Clostridium botulinum</i> A str. ATCC 3502                          | YP_001254936 | YP_001253811, YP_001254018                                           | Clostridiales   |
| <i>Clostridium botulinum</i> A str. <i>Hall</i>                        | YP_001388129 | YP_001387193, YP_001387404                                           | Clostridiales   |
| <i>Clostridium botulinum</i> A3 str. <i>Loch Maree</i>                 | YP_001787749 | YP_001786678, YP_001786927, YP_001715628                             | Clostridiales   |
| <i>Clostridium botulinum</i> B1 str. <i>Okra</i>                       | YP_001781980 | YP_001780912, YP_001781141                                           | Clostridiales   |
| <i>Clostridium botulinum</i> F str. <i>Langeland</i>                   | YP_001391735 | YP_001390639, YP_001390851                                           | Clostridiales   |
| <i>Clostridium difficile</i> 630                                       | YP_001087768 | YP_001086889, YP_001088366, YP_001087593, YP_001088787, YP_001088916 | Clostridiales   |
| <i>Clostridium kluyveri</i> DSM 555                                    | YP_001394805 | YP_001394458, YP_001393961                                           | Clostridiales   |
| <i>Clostridium novyi</i> NT                                            | YP_878224    | YP_878833, YP_878362                                                 | Clostridiales   |
| <i>Clostridium perfringens</i> ATCC 13124                              | YP_696389    | YP_696196, YP_696662                                                 | Clostridiales   |
| <i>Clostridium perfringens</i> SM101                                   | YP_698989    | YP_698808, YP_699260                                                 | Clostridiales   |
| <i>Finegoldia magna</i> ATCC 29328                                     | YP_001692013 | YP_001692264, YP_001691185                                           | Clostridiales   |
| <i>Clostridium perfringens</i> str. 13                                 | NP_562618    | NP_562424, NP_562899, NP_150040                                      | Clostridiales   |
| <i>Clostridium phytofermentans</i> ISDg                                | YP_001559822 | YP_001560365                                                         | Clostridiales   |
| <i>Clostridium tetani</i> E88                                          | NP_781889    | NP_781100, NP_782419                                                 | Clostridiales   |
| <i>Clostridium thermocellum</i> ATCC 27405                             | YP_001036891 |                                                                      | Clostridiales   |
| <i>Desulfotobacterium hafniense</i> Y51                                | YP_518787    | YP_518305, YP_521140                                                 | Clostridiales   |
| <i>Desulfotomaculum reducens</i> MI-1                                  | YP_001113327 | YP_001112334, YP_001113202, YP_001114550                             | Clostridiales   |
| <i>Enterococcus faecalis</i> V583                                      | NP_815358    | NP_815968, NP_815727                                                 | Lactobacillales |
| <i>Exiguobacterium sibiricum</i> 255-15                                | YP_001814357 | YP_001813458                                                         | Bacillales      |
| <i>Geobacillus kaustophilus</i> HTA426                                 | YP_147064    | YP_147668, YP_147541                                                 | Bacillales      |
| <i>Geobacillus thermodenitrificans</i> NG80-2                          | YP_001125185 | YP_001125811, YP_001125646, YP_001127557                             | Bacillales      |
| <i>Helibacterium modesticaldum</i> Ice1                                | YP_001680778 | YP_001680501                                                         | Clostridiales   |
| <i>Lactobacillus acidophilus</i> NCFM                                  | YP_193863    |                                                                      | Lactobacillales |
| <i>Lactobacillus brevis</i> ATCC 367                                   | YP_794972    |                                                                      | Lactobacillales |
| <i>Lactobacillus casei</i> ATCC 334                                    | YP_806621    |                                                                      | Lactobacillales |
| <i>Lactobacillus delbrueckii</i> subsp. <i>bulgaricus</i> ATCC 11842   | YP_619140    |                                                                      | Lactobacillales |
| <i>Lactobacillus delbrueckii</i> subsp. <i>bulgaricus</i> ATCC BAA-365 | YP_813159    | YP_813304                                                            | Lactobacillales |
| <i>Lactobacillus gasserii</i> ATCC 33323                               | YP_814743    |                                                                      | Lactobacillales |
| <i>Lactobacillus helveticus</i> DPC 4571                               | YP_001577426 |                                                                      | Lactobacillales |
| <i>Lactobacillus johnsonii</i> NCC 533                                 | NP_964964    |                                                                      | Lactobacillales |
| <i>Lactobacillus plantarum</i> WCFS1                                   | NP_785400    | YP_133736                                                            | Lactobacillales |
| <i>Lactobacillus reuteri</i> F275                                      | YP_001271380 |                                                                      | Lactobacillales |
| <i>Lactobacillus sakei</i> subsp. <i>sakei</i> 23K                     | YP_395600    | YP_395375                                                            | Lactobacillales |

|                                                                            |              |                               |                         |
|----------------------------------------------------------------------------|--------------|-------------------------------|-------------------------|
| <i>Lactobacillus salivarius</i> UCC118                                     | YP_535613    | YP_536196,YP_536712           | Lactobacillales         |
| <i>Lactococcus lactis</i> subsp. <i>cremoris</i> MG1363                    | YP_001032579 |                               | Lactobacillales         |
| <i>Lactococcus lactis</i> subsp. <i>cremoris</i> SK11                      | YP_809252    |                               | Lactobacillales         |
| <i>Lactococcus lactis</i> subsp. <i>lactis</i> II1403                      | NP_267386    |                               | Lactobacillales         |
| <i>Leuconostoc mesenteroides</i> subsp. <i>mesenteroides</i> ATCC 8293     | YP_818229    | YP_817910                     | Lactobacillales         |
| <i>Leuconostoc citreum</i> KM20                                            | YP_001728008 | YP_001728672                  | Lactobacillales         |
| <i>Listeria innocua</i> Clip11262                                          | NP_470650    |                               | Bacillales              |
| <i>Listeria monocytogenes</i> EGD-e                                        | NP_464800    | NP_466278                     | Bacillales              |
| <i>Listeria monocytogenes</i> str. 4b F2365                                | YP_013891    | YP_015332                     | Bacillales              |
| <i>Listeria welshimeri</i> serovar 6b str. SLCC5334                        | YP_849489    | YP_850900                     | Bacillales              |
| <i>Lysinibacillus sphaericus</i> C3-41                                     |              | YP_001698117,YP_001696638     | Bacillales              |
| <i>Mesoplasma florum</i> L1                                                | YP_053894    |                               | Mollicutes              |
| <i>Moorella thermoacetica</i> ATCC 39073                                   | YP_429883    | YP_429226                     | Thermoanaerobacteriales |
| <i>Mycoplasma agalactiae</i> PG2                                           | YP_001256417 |                               | Mollicutes              |
| <i>Mycoplasma capricolum</i> subsp. <i>capricolum</i> ATCC 27343           | YP_424741    |                               | Mollicutes              |
| <i>Mycoplasma gallisepticum</i> R                                          | NP_853416    |                               | Mollicutes              |
| <i>Mycoplasma genitalium</i> G37                                           | NP_072784    |                               | Mollicutes              |
| <i>Mycoplasma hyopneumoniae</i> 232                                        | YP_115611    |                               | Mollicutes              |
| <i>Mycoplasma hyopneumoniae</i> 7448                                       | YP_287680    |                               | Mollicutes              |
| <i>Mycoplasma hyopneumoniae</i> J                                          | YP_279077    |                               | Mollicutes              |
| <i>Mycoplasma mobile</i> 163K                                              | YP_015779    |                               | Mollicutes              |
| <i>Mycoplasma mycoides</i> subsp. <i>mycoides</i> SC str. PG1              | NP_975898    |                               | Mollicutes              |
| <i>Mycoplasma penetrans</i> HF-2                                           | NP_757800    |                               | Mollicutes              |
| <i>Mycoplasma pneumoniae</i> M129                                          | NP_109949    |                               | Mollicutes              |
| <i>Mycoplasma pulmonis</i> UAB CTIP                                        | NP_326302    |                               | Mollicutes              |
| <i>Mycoplasma synoviae</i> 53                                              | YP_278650    |                               | Mollicutes              |
| <i>Oceanobacillus theyensis</i> HTE831                                     | NP_692467    | NP_693511                     | Bacillales              |
| <i>Oenococcus oeni</i> PSU-1                                               | YP_810595    | YP_809757                     | Lactobacillales         |
| <i>Onion yellows phytoplasma</i> OY-M                                      | NP_950531    |                               | Mollicutes              |
| <i>Pediococcus pentosaceus</i> ATCC 25745                                  | YP_804463    |                               | Lactobacillales         |
| <i>Pelotomaculum thermopropionicum</i> SI                                  | YP_001211796 |                               | Clostridiales           |
| <i>Staphylococcus aureus</i> RF122                                         | YP_416592    |                               | Bacillales              |
| <i>Staphylococcus aureus</i> subsp. <i>aureus</i> COL                      | YP_186125    | YP_187053                     | Bacillales              |
| <i>Staphylococcus aureus</i> subsp. <i>aureus</i> JH1                      | YP_001316473 | YP_001317434                  | Bacillales              |
| <i>Staphylococcus aureus</i> subsp. <i>aureus</i> JH9                      | YP_001246683 | YP_001247637                  | Bacillales              |
| <i>Staphylococcus aureus</i> subsp. <i>aureus</i> MRSA252                  | YP_040637    | YP_041694                     | Bacillales              |
| <i>Staphylococcus aureus</i> subsp. <i>aureus</i> MSSA476                  | YP_043310    | YP_044257                     | Bacillales              |
| <i>Staphylococcus aureus</i> subsp. <i>aureus</i> Mu3                      | YP_001441830 | YP_001442828                  | Bacillales              |
| <i>Staphylococcus aureus</i> subsp. <i>aureus</i> Mu50                     | NP_371774    | NP_372778                     | Bacillales              |
| <i>Staphylococcus aureus</i> subsp. <i>aureus</i> MW2                      | NP_645950    | NP_646990                     | Bacillales              |
| <i>Staphylococcus aureus</i> subsp. <i>aureus</i> N315                     | NP_374366    | NP_375367                     | Bacillales              |
| <i>Staphylococcus aureus</i> subsp. <i>aureus</i> NCTC 8325                | YP_499758    | YP_500982                     | Bacillales              |
| <i>Staphylococcus aureus</i> subsp. <i>aureus</i> str. Newman              | YP_001332194 | YP_001333190                  | Bacillales              |
| <i>Staphylococcus aureus</i> subsp. <i>aureus</i> USA300                   | YP_493840    | YP_494843,YP_492704           | Bacillales              |
| <i>Staphylococcus aureus</i> subsp. <i>aureus</i> USA300_TCH1516           | YP_001575075 | YP_001576107                  | Bacillales              |
| <i>Staphylococcus epidermidis</i> ATCC 12228                               | NP_764481    | NP_765383,NP_765037           | Bacillales              |
| <i>Staphylococcus epidermidis</i> RP62A                                    | YP_188398    | YP_189399                     | Bacillales              |
| <i>Staphylococcus haemolyticus</i> JCSC1435                                | YP_253579    | YP_252713                     | Bacillales              |
| <i>Staphylococcus saprophyticus</i> subsp. <i>saprophyticus</i> ATCC 15305 | YP_301608    | YP_300749                     | Bacillales              |
| <i>Streptococcus agalactiae</i> 2603V/R                                    | NP_688016    |                               | Lactobacillales         |
| <i>Streptococcus agalactiae</i> A909                                       | YP_329721    |                               | Lactobacillales         |
| <i>Streptococcus agalactiae</i> NEM316                                     | NP_735489    | NP_734855,NP_735167,NP_735440 | Lactobacillales         |

*Streptococcus gordonii* str. Challis substr. CH1  
*Streptococcus mutans* UA159  
*Streptococcus pneumoniae* D39  
*Streptococcus pneumoniae* Hungary19A-6  
*Streptococcus pneumoniae* R6  
*Streptococcus pneumoniae* TIGR4  
*Streptococcus pyogenes* M1 GAS  
*Streptococcus pyogenes* MGAS10270  
*Streptococcus pyogenes* MGAS10394  
*Streptococcus pyogenes* MGAS10750  
*Streptococcus pyogenes* MGAS2096  
*Streptococcus pyogenes* MGAS315  
*Streptococcus pyogenes* MGAS5005  
*Streptococcus pyogenes* MGAS6180  
*Streptococcus pyogenes* MGAS8232  
*Streptococcus pyogenes* MGAS9429  
*Streptococcus pyogenes* SSI-1  
*Streptococcus pyogenes* str. *Manfredo*  
*Streptococcus sanguinis* SK36  
*Streptococcus suis* 05ZYH33  
*Streptococcus suis* 98HAH33  
*Streptococcus thermophilus* CNRZ1066  
*Streptococcus thermophilus* LMD-9  
*Streptococcus thermophilus* LMG 18311  
*Symbiobacterium thermophilum* IAM 14863  
*Syntrophomonas wolfei* subsp. *wolfei* str. *Goettingen*  
*Thermoanaerobacter pseudethanolicus* ATCC 33223  
*Thermoanaerobacter* sp. X514  
*Thermoanaerobacter tengcongensis* MB4  
*Ureaplasma parvum* serovar 3 str. ATCC 27815  
*Ureaplasma parvum* serovar 3 str. ATCC 700970

|              |           |                         |
|--------------|-----------|-------------------------|
| YP_001450484 |           | Lactobacillales         |
| NP_721397    |           | Lactobacillales         |
| YP_816589    |           | Lactobacillales         |
| YP_001694689 |           | Lactobacillales         |
| NP_358734    |           | Lactobacillales         |
| NP_345727    |           | Lactobacillales         |
| NP_269314    | YP_603190 | Lactobacillales         |
| YP_598608    |           | Lactobacillales         |
| YP_060199    |           | Lactobacillales         |
| YP_602528    |           | Lactobacillales         |
| YP_600555    |           | Lactobacillales         |
| NP_664624    |           | Lactobacillales         |
| YP_282248    |           | Lactobacillales         |
| YP_280327    |           | Lactobacillales         |
| NP_607246    |           | Lactobacillales         |
| YP_596734    |           | Lactobacillales         |
| NP_802283    |           | Lactobacillales         |
| YP_001128464 |           | Lactobacillales         |
| YP_001035139 |           | Lactobacillales         |
| YP_001198351 |           | Lactobacillales         |
| YP_001200558 |           | Lactobacillales         |
| YP_141300    |           | Lactobacillales         |
| YP_820344    |           | Lactobacillales         |
| YP_139379    |           | Lactobacillales         |
| YP_075310    | YP_075501 | Lactobacillales         |
| YP_753530    | YP_753202 | Clostridiales           |
| YP_001665254 |           | Thermoanaerobacteriales |
| YP_001663322 |           | Thermoanaerobacteriales |
| NP_623067    | NP_623335 | Thermoanaerobacteriales |
| YP_001752675 |           | Mollicutes              |
| NP_078429    |           | Mollicutes              |

### Fusobacteria

*Fusobacterium nucleatum* subsp. *nucleatum* ATCC 25586

|           |  |                  |
|-----------|--|------------------|
| NP_603966 |  | Fusobacteriaceae |
|-----------|--|------------------|

### Alphaproteobacteria

*Acidiphilium cryptum* JF-5  
*Agrobacterium tumefaciens* str. C58  
*Anaplasma marginale* str. *St. Maries*  
*Anaplasma phagocytophilum* HZ  
*Azorhizobium caulinodans* ORS 571  
*Bartonella bacilliformis* KC583  
*Bartonella henselae* str. *Houston-1*  
*Bartonella quintana* str. *Toulouse*  
*Bartonella tribocorum* CIP 105476  
*Bradyrhizobium japonicum* USDA 110  
*Bradyrhizobium* sp. *BTAi1*  
*Bradyrhizobium* sp. *ORS278*  
*Brucella abortus* biovar 1 str. 9-941  
*Brucella canis* ATCC 23365  
*Brucella melitensis* 16M  
*Brucella melitensis* biovar *Abortus 2308*  
*Brucella ovis* ATCC 25840  
*Brucella suis* 1330

|              |              |                  |
|--------------|--------------|------------------|
| YP_001233869 |              | Rhodospirillales |
| NP_356605    | NP_354310    | Rhizobiales      |
| YP_153787    |              | Rickettsiales    |
| YP_505187    |              | Rickettsiales    |
| YP_001524777 |              | Rhizobiales      |
| YP_989131    |              | Rhizobiales      |
| YP_033622    |              | Rhizobiales      |
| YP_032289    |              | Rhizobiales      |
| YP_001609502 |              | Rhizobiales      |
| NP_767212    | NP_771751    | Rhizobiales      |
| YP_001236532 | YP_001240665 | Rhizobiales      |
| YP_001202546 | YP_001206466 | Rhizobiales      |
| YP_223392    |              | Rhizobiales      |
| YP_001594552 |              | Rhizobiales      |
| NP_541644    |              | Rhizobiales      |
| YP_418811    |              | Rhizobiales      |
| YP_001257591 |              | Rhizobiales      |
| NP_699788    |              | Rhizobiales      |

|                                                  |                            |              |                  |
|--------------------------------------------------|----------------------------|--------------|------------------|
| <i>Brucella suis</i> ATCC 23445                  | YP_001622411               |              | Rhizobiales      |
| <i>Candidatus Pelagibacter ubique</i> HTCC1062   | YP_266491                  |              | Rickettsiales    |
| <i>Caulobacter crescentus</i> CB15               | NP_421254                  |              | Caulobacterales  |
| <i>Caulobacter</i> sp. K31                       | YP_001683133               | YP_001685265 | Caulobacterales  |
| <i>Dinoroseobacter shibae</i> DFL 12             | YP_001532480               |              | Rhodobacterales  |
| <i>Ehrlichia canis</i> str. Jake                 | YP_302965                  |              | Rickettsiales    |
| <i>Ehrlichia chaffeensis</i> str. Arkansas       | YP_507548                  |              | Rickettsiales    |
| <i>Ehrlichia ruminantium</i> str. Gardel         | YP_196269                  |              | Rickettsiales    |
| <i>Ehrlichia ruminantium</i> str. Welgevonden    | YP_180204                  |              | Rickettsiales    |
| <i>Ehrlichia ruminantium</i> str. Welgevonden    | YP_197223                  |              | Rickettsiales    |
| <i>Erythrobacter litoralis</i> HTCC2594          | YP_457851                  | YP_458571    | Sphingomonadales |
| <i>Gluconacetobacter diazotrophicus</i> PAI 5    | YP_001600342               |              | Rhodospirillales |
| <i>Gluconobacter oxydans</i> 621H                | YP_191680                  |              | Rhodospirillales |
| <i>Granulibacter bethesdensis</i> CGDNIH1        | YP_744625                  |              | Rhodospirillales |
| <i>Hyphomonas neptunium</i> ATCC 15444           | YP_760971                  |              | Rhodobacterales  |
| <i>Jannaschia</i> sp. CCS1                       | YP_511102                  | YP_508220    | Rhodobacterales  |
| <i>Magnetospirillum magneticum</i> AMB-1         | YP_420045                  |              | Rhodospirillales |
| <i>Maricaulis maris</i> MCS10                    | YP_756512                  |              | Rhodobacterales  |
| <i>Mesorhizobium loti</i> MAFF303099             | NP_102557                  |              | Rhizobiales      |
| <i>Mesorhizobium</i> sp. BNC1                    | YP_673915                  | YP_675314    | Rhizobiales      |
| <i>Methylobacterium</i> sp. 4-46                 | YP_001771127               | YP_001771806 | Rhizobiales      |
| <i>Methylobacterium extorquens</i> PA1           | YP_001640766               | YP_001639444 | Rhizobiales      |
| <i>Methylobacterium radiotolerans</i> JCM 2831   | YP_001753697, YP_001766487 | YP_001753451 | Rhizobiales      |
| <i>Neorickettsia sennetsu</i> str. Miyayama      | YP_506474                  |              | Rickettsiales    |
| <i>Nitrobacter hamburgensis</i> X14              | YP_577687                  | YP_579129    | Rhizobiales      |
| <i>Nitrobacter winogradskyi</i> Nb-255           | YP_318325                  |              | Rhizobiales      |
| <i>Novosphingobium aromaticivorans</i> DSM 12444 | YP_497077                  | YP_497864    | Sphingomonadales |
| <i>Ochrobactrum anthropi</i> ATCC 49188          | YP_001372206               | YP_001372842 | Rhizobiales      |
| <i>Orientia tsutsugamushi</i> Boryong            | YP_001249094               |              | Rickettsiales    |
| <i>Paracoccus denitrificans</i> PD1222           | YP_914467                  |              | Rhodobacterales  |
| <i>Parvibaculum lavamentivorans</i> DS-1         | YP_001414095               |              | Rhizobiales      |
| <i>Rhizobium etli</i> CFN 42                     | YP_469164                  | YP_472371    | Rhizobiales      |
| <i>Rhizobium leguminosarum</i> bv. viciae 3841   | YP_767339                  | YP_771338    | Rhizobiales      |
| <i>Rhodobacter sphaeroides</i> 2.4.1             | YP_352231                  | YP_354029    | Rhodobacterales  |
| <i>Rhodobacter sphaeroides</i> ATCC 17025        | YP_001168510               | YP_001169159 | Rhodobacterales  |
| <i>Rhodobacter sphaeroides</i> ATCC 17029        | YP_001042733               | YP_001044479 | Rhodobacterales  |
| <i>Rhodopseudomonas palustris</i> BisA53         | YP_782291                  |              | Rhizobiales      |
| <i>Rhodopseudomonas palustris</i> BisB18         | YP_532112                  |              | Rhizobiales      |
| <i>Rhodopseudomonas palustris</i> BisB5          | YP_570160                  |              | Rhizobiales      |
| <i>Rhodopseudomonas palustris</i> CGA009         | NP_948463                  |              | Rhizobiales      |
| <i>Rhodopseudomonas palustris</i> HaA2           | YP_486035                  |              | Rhizobiales      |
| <i>Rhodospirillum rubrum</i> ATCC 11170          | YP_428284                  |              | Rhodospirillales |
| <i>Rickettsia akari</i> str. Hartford            | YP_001493295               |              | Rickettsiales    |
| <i>Rickettsia bellii</i> OSU 85-389              | YP_001496307               |              | Rickettsiales    |
| <i>Rickettsia bellii</i> RML369-C                | YP_537882                  |              | Rickettsiales    |
| <i>Rickettsia canadensis</i> str. McKiel         | YP_001492485               |              | Rickettsiales    |
| <i>Rickettsia conorii</i> str. Malish 7          | NP_360086                  |              | Rickettsiales    |
| <i>Rickettsia felis</i> URRWXCa2                 | YP_246546                  |              | Rickettsiales    |
| <i>Rickettsia massiliae</i> MTU5                 | YP_001499231               |              | Rickettsiales    |
| <i>Rickettsia prowazekii</i> str. Madrid E       | NP_220709                  |              | Rickettsiales    |
| <i>Rickettsia rickettsii</i> str. Iowa           | YP_001649818               |              | Rickettsiales    |
| <i>Rickettsia rickettsii</i> str. 'Sheila Smith' | YP_001494563               |              | Rickettsiales    |

|                                                           |                           |  |                  |
|-----------------------------------------------------------|---------------------------|--|------------------|
| <i>Rickettsia typhi</i> str. Wilmington                   | YP_067279                 |  | Rickettsiales    |
| <i>Roseobacter denitrificans</i> OCh 114                  | YP_682413                 |  | Rhodobacterales  |
| <i>Silicibacter pomeroyi</i> DSS-3                        | YP_168282                 |  | Rhodobacterales  |
| <i>Silicibacter</i> sp. TM1040                            | YP_614333                 |  | Rhodobacterales  |
| <i>Sinorhizobium medicae</i> WSM419                       | YP_001326622              |  | Rhizobiales      |
| <i>Sinorhizobium melliloti</i> 1021                       | NP_385406                 |  | Rhizobiales      |
| <i>Sphingomonas wittichii</i> RW1                         | YP_001260160,YP_001263436 |  | Sphingomonadales |
| <i>Sphingopyxis alaskensis</i> RB2256                     | YP_616260                 |  | Sphingomonadales |
| <i>Wolbachia endosymbiont of Drosophila melanogaster</i>  | NP_966850                 |  | Rickettsiales    |
| <i>Wolbachia endosymbiont strain TRS of Brugia malayi</i> | YP_197871                 |  | Rickettsiales    |
| <i>Xanthobacter autotrophicus</i> Py2                     | YP_001418795              |  | Rhizobiales      |
| <i>Zymomonas mobilis</i> subsp. <i>mobilis</i> ZM4        | YP_162928                 |  | Sphingomonadales |

### Betaproteobacteria

|                                                         |              |                                                                  |                 |
|---------------------------------------------------------|--------------|------------------------------------------------------------------|-----------------|
| <i>Acidovorax avenae</i> subsp. <i>citrulli</i> AAC00-1 | YP_969856    | YP_968937,YP_972836                                              | Burkholderiales |
| <i>Acidovorax</i> sp. JS42                              |              | YP_985731,YP_985607,YP_986473,YP_974145,YP_988170                | Burkholderiales |
| <i>Azoarcus</i> sp. BHT2                                | YP_933299    | YP_931600                                                        | Rhodocyclales   |
| <i>Azoarcus</i> sp. EbN1                                | YP_160972    | YP_195373,YP_158408,YP_195596,YP_158693                          | Rhodocyclales   |
| <i>Bordetella bronchiseptica</i> RB50                   | NP_889376    | NP_891494                                                        | Burkholderiales |
| <i>Bordetella parapertussis</i> 12822                   | NP_884889    | NP_886500                                                        | Burkholderiales |
| <i>Bordetella pertussis</i> Tohama I                    |              | NP_879317                                                        | Burkholderiales |
| <i>Bordetella petrii</i> DSM 12804                      | YP_001631006 | YP_001630053,YP_001629640,YP_001632921,YP_001629903,YP_001628636 | Burkholderiales |
| <i>Burkholderia ambifaria</i> AMMD                      | YP_778070    | YP_771691,YP_775075                                              | Burkholderiales |
| <i>burkholderia ambifaria</i> MC40-6                    | YP_001815913 | YP_001809760                                                     | Burkholderiales |
| <i>Burkholderia cenocepacia</i> AU 1054                 | YP_625473    | YP_622389                                                        | Burkholderiales |
| <i>Burkholderia cenocepacia</i> HI2424                  | YP_839621    | YP_836771                                                        | Burkholderiales |
| <i>Burkholderia cenocapacia</i> MC0-3                   | YP_001774097 | YP_001766426                                                     | Burkholderiales |
| <i>Burkholderia mallei</i> ATCC 23344                   |              | YP_101979                                                        | Burkholderiales |
| <i>Burkholderia mallei</i> NCTC 10229                   |              | YP_001028234                                                     | Burkholderiales |
| <i>Burkholderia mallei</i> NCTC 10247                   |              | YP_001081875                                                     | Burkholderiales |
| <i>Burkholderia mallei</i> SAVP1                        |              | YP_994105                                                        | Burkholderiales |
| <i>Burkholderia multivorans</i> ATCC 17616              | YP_001585914 | YP_001581308                                                     | Burkholderiales |
| <i>Burkholderia pseudomallei</i> 1106a                  |              | YP_001064439                                                     | Burkholderiales |
| <i>Burkholderia pseudomallei</i> 1710b                  |              | YP_331758                                                        | Burkholderiales |
| <i>Burkholderia pseudomallei</i> 668                    |              | YP_001057200                                                     | Burkholderiales |
| <i>Burkholderia pseudomallei</i> K96243                 |              | YP_106745                                                        | Burkholderiales |
| <i>Burkholderia</i> sp. 383                             |              | YP_370719                                                        | Burkholderiales |
| <i>Burkholderia thailandensis</i> E264                  |              | YP_440684                                                        | Burkholderiales |
| <i>Burkholderia vietnamiensis</i> G4                    | YP_001115703 | YP_001119960,YP_001121114,YP_001110078,YP_001110413,YP_001110058 | Burkholderiales |
| <i>Burkholderia xenovorans</i> LB400                    | YP_554144    | YP_559782,YP_556633                                              | Burkholderiales |
| <i>Chromobacterium violaceum</i> ATCC 12472             |              | NP_903939                                                        | Neisseriales    |
| <i>Dechloromonas aromatica</i> RCB                      |              | YP_283247                                                        | Rhodocyclales   |
| <i>Delftia acidovorans</i> SPH-1                        | YP_001565359 | YP_001565166,YP_001561915                                        | Burkholderiales |
| <i>Herminiimonas arsenicoxydans</i>                     |              | YP_001100248,YP_001098479                                        | Burkholderiales |
| <i>Janthinobacterium</i> sp. Marseille                  |              | YP_001351829                                                     | Burkholderiales |
| <i>Leptothrix cholodnii</i> SP 6                        |              | YP_001789269                                                     | Burkholderiales |
| <i>Methylibium petroleiphilum</i> PM1                   |              | YP_001021533,YP_001019462,YP_001023411                           | Burkholderiales |
| <i>Methylobacillus flagellatus</i> KT                   | YP_544669    |                                                                  | Methylophilales |
| <i>Neisseria gonorrhoeae</i> FA 1090                    |              | YP_544339                                                        | Neisseriales    |
| <i>Neisseria meningitidis</i> 053442                    |              | YP_208895                                                        | Neisseriales    |
| <i>Neisseria meningitidis</i> FAM18                     |              | YP_001600116                                                     | Neisseriales    |
| <i>Neisseria meningitidis</i> FAM18                     |              | YP_974241                                                        | Neisseriales    |
| <i>Neisseria meningitidis</i> MC58                      |              | NP_273176                                                        | Neisseriales    |
| <i>Neisseria meningitidis</i> Z2491                     |              | NP_283005                                                        | Neisseriales    |

*Nitrosomonas europaea* ATCC 19718  
*Nitrosomonas eutropha* C91  
*Nitrosospira multiformis* ATCC 25196  
*Polaromonas naphthalenivorans* CJ2  
*Polaromonas* sp. JS666  
*Polynucleobacter necessarius* STIR1  
*Polynucleobacter* sp. QLW-P1DMWA-1  
*Ralstonia eutropha* H16  
*Ralstonia eutropha* JMP134  
*Ralstonia metallidurans* CH34  
*Ralstonia solanacearum* GMI1000  
*Rhodoferax ferrireducens* T118  
*Thiobacillus denitrificans* ATCC 25259  
*Verminephrobacter eiseniae* EF01-2

|           |           |                     |                  |
|-----------|-----------|---------------------|------------------|
|           |           | NP_841983           | Nitrosomonadales |
|           |           | YP_746369,YP_746639 | Nitrosomonadales |
| YP_410740 |           | YP_411096           | Nitrosomonadales |
|           |           | YP_984179           | Burkholderiales  |
|           |           | YP_551491           | Burkholderiales  |
|           |           | YP_001798447        | Burkholderiales  |
|           |           | YP_001156856        | Burkholderiales  |
| YP_725990 |           | YP_728128           | Burkholderiales  |
| YP_298569 |           | YP_293678,YP_297614 | Burkholderiales  |
|           |           | YP_584446,YP_585710 | Burkholderiales  |
|           |           | NP_518187           | Burkholderiales  |
|           |           | YP_525185           | Burkholderiales  |
| YP_314503 | YP_313768 |                     | Hydrogenophilaes |
|           |           | YP_997925           | Burkholderiales  |

### Deltaproteobacteria

*Anaeromyxobacter dehalogenans* 2CP-C  
*Anaeromyxobacter* sp. Fw109-5  
*Bdellovibrio bacteriovorus* HD100  
*Desulfococcus oleovorans* Hxd3  
*Desulfotalea psychrophila* LSV54  
*Desulfovibrio desulfuricans* G20  
*Desulfovibrio vulgaris* subsp. *vulgaris* DP4  
*Desulfovibrio vulgaris* subsp. *vulgaris* str. *Hildenborough*  
*Geobacter metallireducens* GS-15  
*Geobacter sulfurreducens* PCA  
*Geobacter uraniireducens* Rf4  
*Lawsonia intracellularis* PHE/MN1-00  
*Myxococcus xanthus* DK 1622  
*Pelobacter carbinolicus* DSM 2380  
*Pelobacter propionicus* DSM 2379  
*Sorangium cellulosum* 'So ce 56'  
*Syntrophobacter fumaroxidans* MPOB  
*Syntrophus aciditrophicus* SB

|              |              |              |                     |
|--------------|--------------|--------------|---------------------|
| YP_466158    | YP_465906    |              | Myxococcales        |
| YP_001378897 | YP_001379878 |              | Myxococcales        |
|              | NP_967909    |              | Bdellovibrionales   |
|              | YP_001530326 |              | Desulfobacterales   |
|              |              | YP_066353    | Desulfobacterales   |
|              | YP_386602    | YP_387814    | Desulfovibrionales  |
|              | YP_965462    | YP_966391    | Desulfovibrionales  |
|              | YP_012598    | YP_011529    | Desulfovibrionales  |
|              | YP_383858    |              | Desulfuromonadales  |
|              | NP_953595    |              | Desulfuromonadales  |
|              | YP_001232415 |              | Desulfuromonadales  |
|              | YP_595029    |              | Desulfovibrionales  |
|              | YP_631211    | YP_628804    | Myxococcales        |
|              | YP_355836    |              | Desulfuromonadales  |
|              | YP_900217    |              | Desulfuromonadales  |
| YP_001611798 | YP_001615758 | YP_001614054 | Myxococcales        |
|              | YP_844349    |              | Syntrophobacterales |
|              | YP_461419    |              | Syntrophobacterales |

### Epsilonproteobacteria

*Arcobacter butzleri* RM4018  
*Campylobacter concisus* 13826  
*Campylobacter curvus* 525.92  
*Campylobacter fetus* subsp. *fetus* 82-40  
*Campylobacter hominis* ATCC BAA-381  
*Campylobacter jejuni* RM1221  
*Campylobacter jejuni* subsp. *doylei* 269.97  
*Campylobacter jejuni* subsp. *jejuni* 81116  
*Campylobacter jejuni* subsp. *jejuni* 81-176  
*Campylobacter jejuni* subsp. *jejuni* NCTC 11168  
*Helicobacter acinonychis* str. *Sheeba*  
*Helicobacter hepaticus* ATCC 51449  
*Helicobacter pylori* 26695  
*Helicobacter pylori* HPAG1  
*Helicobacter pylori* J99  
*Nitratiruptor* sp. SB155-2  
*Sulfurimonas denitrificans* DSM 1251  
*Sulfurovum* sp. NBC37-1

|  |                                 |              |                   |
|--|---------------------------------|--------------|-------------------|
|  | YP_001491118                    |              | Campylobacterales |
|  | YP_001467625                    |              | Campylobacterales |
|  | YP_001408974                    |              | Campylobacterales |
|  | YP_891380                       |              | Campylobacterales |
|  | YP_001407082                    | YP_001405772 | Campylobacterales |
|  | YP_179824                       |              | Campylobacterales |
|  | YP_001398963                    |              | Campylobacterales |
|  | YP_001483157                    |              | Campylobacterales |
|  | YP_001001325,YP_980071          | YP_001004049 | Campylobacterales |
|  | NP_282812                       |              | Campylobacterales |
|  | YP_665198                       |              | Campylobacterales |
|  | NP_861329                       |              | Campylobacterales |
|  | NP_206916, NP_207238            |              | Campylobacterales |
|  | YP_626857                       |              | Campylobacterales |
|  | NP_222829, NP_223637, NP_223648 |              | Campylobacterales |
|  | YP_001357114                    | YP_001357221 | unclassified      |
|  | YP_392687                       |              | Campylobacterales |
|  | YP_001357405                    |              | unclassified      |

|                                                                              |                             |                            |                            |
|------------------------------------------------------------------------------|-----------------------------|----------------------------|----------------------------|
| <i>Wolinella succinogenes</i> DSM 1740                                       | NP_907653                   |                            | Campylobacteriales         |
| <b>Gammaproteobacteria</b>                                                   |                             |                            |                            |
| <i>Acinetobacter baumannii</i> ATCC 17978                                    | YP_001083496 , YP_001083702 |                            | Pseudomonadales            |
| <i>Acinetobacter baumannii</i> AYE                                           | YP_001715103                |                            | Pseudomonadales            |
| <i>Acinetobacter baumannii</i> SDF                                           | YP_001708199                |                            | Pseudomonadales            |
| <i>Acinetobacter</i> sp. ADP1                                                | YP_045242                   |                            | Pseudomonadales            |
| <i>Actinobacillus pleuropneumoniae</i> L20                                   | YP_001053401                |                            | Pasteurellales             |
| <i>Actinobacillus pleuropneumoniae</i> serovar 3 str. JL03                   | YP_001651707                | YP_001053449, YP_001651753 | Pasteurellales             |
| <i>Actinobacillus succinogenes</i> 130Z                                      | YP_001344693                | YP_001344993               | Pasteurellales             |
| <i>Aeromonas hydrophila</i> subsp. <i>hydrophila</i> ATCC 7966               | YP_857604                   | YP_858472                  | Aeromonadales              |
| <i>Aeromonas salmonicida</i> subsp. <i>salmonicida</i> A449                  | YP_001142853                | YP_001140206, YP_001144217 | Aeromonadales              |
| <i>Alcanivorax borkumensis</i> SK2                                           | YP_692732                   |                            | Oceanospirillales          |
| <i>Alkalilimnicola ehrlichei</i> MLHE-1                                      | YP_743462                   |                            | Chromatiales               |
| <i>Baumannia cicadellinicola</i> str. Hc ( <i>Homalodisca coagulata</i> )    | YP_588751                   |                            | unclassified               |
| <i>Buchnera aphidicola</i> str. APS ( <i>Acyrtosiphon pisum</i> )            | NP_240108                   |                            | Enterobacteriales          |
| <i>Buchnera aphidicola</i> str. Bp ( <i>Baizongia pistaciae</i> )            |                             |                            | Enterobacteriales          |
| <i>Buchnera aphidicola</i> str. Cc ( <i>Cinara cedri</i> )                   |                             |                            | Enterobacteriales          |
| <i>Buchnera aphidicola</i> str. Sg ( <i>Schizaphis graminum</i> )            | NP_660620                   |                            | Enterobacteriales          |
| <i>Candidatus Blochmannia floridanus</i>                                     |                             |                            | Enterobacteriales          |
| <i>Candidatus Blochmannia pennsylvanicus</i> str. BPEN                       |                             |                            | Enterobacteriales          |
| <i>Candidatus Carsonella ruddii</i> PV                                       |                             |                            | unclassified               |
| <i>Candidatus Ruthia magnifica</i> str. Cm ( <i>Calyptogenia magnifica</i> ) | YP_904210                   |                            | sulfur-oxidizing symbionts |
| <i>Candidatus Vesicomosocius okutanii</i> HA                                 | YP_001219759                |                            | sulfur-oxidizing symbionts |
| <i>Chromohalobacter salexigens</i> DSM 3043                                  | YP_573612                   | YP_574196                  | Oceanospirillales          |
| <i>Citrobacter koseri</i> ATCC BAA-895                                       | YP_001452924                | YP_001453355               | Enterobacteriales          |
| <i>Colwellia psychrethytraea</i> 34H                                         | YP_267940                   | YP_271431                  | Alteromonadales            |
| <i>Coxiella burnetii</i> Dugway 5J108-111                                    | YP_001425405                |                            | Legionellales              |
| <i>Coxiella burnetii</i> RSA 331                                             | YP_001595977                |                            | Legionellales              |
| <i>Coxiella burnetii</i> RSA 493                                             | NP_820975                   |                            | Legionellales              |
| <i>Dichelobacter nodosus</i> VCS1703A                                        | YP_001209082                |                            | Cardiobacteriales          |
| <i>Enterobacter sakazakii</i> ATCC BAA-894                                   | YP_001437661                | YP_001438246               | Enterobacteriales          |
| <i>Enterobacter</i> sp. 638                                                  | YP_001176922                | YP_001176414               | Enterobacteriales          |
| <i>Erwinia carotovora</i> subsp. <i>atroseptica</i> SCRI1043                 |                             | YP_050432, YP_048644       | Enterobacteriales          |
| <i>Escherichia coli</i> 536                                                  | YP_669237                   | YP_669615                  | Enterobacteriales          |
| <i>Escherichia coli</i> DH10B                                                | YP_001730271                | YP_001730740               | Enterobacteriales          |
| <i>Escherichia coli</i> APEC O1                                              | YP_852447                   | YP_852847                  | Enterobacteriales          |
| <i>Escherichia coli</i> CFT073                                               | NP_753645                   | NP_754060                  | Enterobacteriales          |
| <i>Escherichia coli</i> E24377A                                              | YP_001462571                | YP_001463061               | Enterobacteriales          |
| <i>Escherichia coli</i> HS                                                   | YP_001458097                | YP_001458543               | Enterobacteriales          |
| <i>Escherichia coli</i> K12                                                  | NP_415790                   | NP_416277                  | Enterobacteriales          |
| <i>Escherichia coli</i> O157:H7 EDL933                                       | NP_287925                   | NP_288196                  | Enterobacteriales          |
| <i>Escherichia coli</i> O157:H7 str. Sakai                                   | NP_309873                   | NP_310496                  | Enterobacteriales          |
| <i>Escherichia coli</i> SECEC SMS-3-5                                        | YP_001743911                | YP_001743486               | Enterobacteriales          |
| <i>Escherichia coli</i> UTI89                                                | AP_001900                   | YP_540965                  | Enterobacteriales          |
| <i>Escherichia coli</i> W3110                                                | YP_540552                   | AP_002382                  | Enterobacteriales          |
| <i>Francisella philomiragia</i> subsp. <i>Philomiragia</i> ATCC25017         | YP_001677125                |                            | Thiotrichales              |
| <i>Francisella tularensis</i> subsp. <i>holarctica</i>                       | YP_001427881                |                            | Thiotrichales              |
| <i>Francisella tularensis</i> subsp. <i>holarctica</i> FTA                   | YP_763048                   |                            | Thiotrichales              |
| <i>Francisella tularensis</i> subsp. <i>holarctica</i> OSU18                 | YP_513198                   |                            | Thiotrichales              |
| <i>Francisella tularensis</i> subsp. <i>novicida</i> U112                    | YP_898089                   |                            | Thiotrichales              |
| <i>Francisella tularensis</i> subsp. <i>tularensis</i> FSC198                | YP_667035                   |                            | Thiotrichales              |
| <i>Francisella tularensis</i> subsp. <i>tularensis</i> SCHU S4               | YP_169903                   |                            | Thiotrichales              |

|                                                                                                    |                      |                            |                   |
|----------------------------------------------------------------------------------------------------|----------------------|----------------------------|-------------------|
| <i>Francisella tularensis</i> subsp. <i>tularensis</i> WY96-3418                                   | YP_001122172         |                            | Thiotrichales     |
| <i>Haemophilus ducreyi</i> 35000HP                                                                 | NP_873809            | NP_873711, NP_873446       | Pasteurellales    |
| <i>Haemophilus influenzae</i> 86-028NP                                                             | YP_249232            | YP_248156, YP_247759       | Pasteurellales    |
| <i>Haemophilus influenzae</i> PittEE                                                               | YP_001290656         | YP_001290029               | Pasteurellales    |
| <i>Haemophilus influenzae</i> PittGG                                                               | YP_001291588         | YP_001292393               | Pasteurellales    |
| <i>Haemophilus influenzae</i> Rd KW20                                                              | NP_439516            | NP_438605                  | Pasteurellales    |
| <i>Haemophilus somnus</i> 129PT                                                                    | YP_719124            | YP_719522, YP_719942       | Pasteurellales    |
| <i>Haemophilus somnus</i> 2336                                                                     | YP_001784712         | YP_001783658, YP_001785040 | Pasteurellales    |
| <i>Hahella chejuensis</i> KCTC 2396                                                                | YP_435874            |                            | Oceanospirillales |
| <i>Halorhodospira halophila</i> SL1                                                                | YP_001003891         |                            | Chromatiales      |
| <i>Idiomarina loihiensis</i> L2TR                                                                  | YP_155399            |                            | Alteromonadales   |
| <i>Klebsiella pneumoniae</i> subsp. <i>pneumoniae</i> MGH 78578                                    | YP_001334933         | YP_001334871               | Enterobacteriales |
| <i>Legionella pneumophila</i> str. <i>Corby</i>                                                    | YP_001249874         |                            | Legionellales     |
| <i>Legionella pneumophila</i> str. <i>Lens</i>                                                     | YP_127851            |                            | Legionellales     |
| <i>Legionella pneumophila</i> str. <i>Paris</i>                                                    | YP_124957            |                            | Legionellales     |
| <i>Legionella pneumophila</i> subsp. <i>pneumophila</i> str. <i>Philadelphia 1</i>                 | YP_096604            |                            | Legionellales     |
| <i>Mannheimia succiniciproducens</i> MBEL55E                                                       | YP_088288            | YP_087922                  | Pasteurellales    |
| <i>Marinobacter aquaeolei</i> VT8                                                                  | YP_956966, YP_958425 | YP_959791                  | Alteromonadales   |
| <i>Marinomonas</i> sp. <i>MWYL1</i>                                                                | YP_001340971         | YP_001342115               | Oceanospirillales |
| <i>Methylococcus capsulatus</i> str. <i>Bath</i>                                                   | YP_115233            |                            | Methylococcales   |
| <i>Nitrosococcus oceani</i> ATCC 19707                                                             | YP_344982            |                            | Chromatiales      |
| <i>Pasteurella multocida</i> subsp. <i>multocida</i> str. <i>Pm70</i>                              | NP_245552            | NP_245144                  | Pasteurellales    |
| <i>Pectobacterium atrosepticum</i> SCRI1043                                                        | YP_050381            |                            | Enterobacteriales |
| <i>Photobacterium profundum</i> SS9                                                                | YP_130661            | YP_130771                  | Vibrionales       |
| <i>Photorhabdus luminescens</i> subsp. <i>laumondii</i> TTO1                                       | NP_929674            | NP_929786, NP_928366       | Enterobacteriales |
| <i>Pseudoalteromonas atlantica</i> T6c                                                             | YP_662415            | YP_660358                  | Alteromonadales   |
| <i>Pseudoalteromonas haloplanktis</i> TAC125                                                       | YP_339866            | YP_340847, YP_340837       | Alteromonadales   |
| <i>Pseudomonas aeruginosa</i> PA7                                                                  | YP_001348358         | YP_001347520, YP_001349815 | Pseudomonadales   |
| <i>Pseudomonas aeruginosa</i> PAO1                                                                 | NP_250934            | NP_251701                  | Pseudomonadales   |
| <i>Pseudomonas aeruginosa</i> UCBPP-PA14                                                           | YP_790992            | YP_790161, YP_792914       | Pseudomonadales   |
| <i>Pseudomonas entomophila</i> L48                                                                 | YP_607900            | YP_609232                  | Pseudomonadales   |
| <i>Pseudomonas fluorescens</i> Pf-5                                                                | YP_260520            | YP_259061, YP_261755       | Pseudomonadales   |
| <i>Pseudomonas fluorescens</i> PfO-1                                                               | YP_348675            | YP_349604                  | Pseudomonadales   |
| <i>Pseudomonas mendocina</i> ymp                                                                   | YP_001188262         | YP_001187079               | Pseudomonadales   |
| <i>Pseudomonas putida</i> F1                                                                       | YP_001267266         | YP_001268911               | Pseudomonadales   |
| <i>Pseudomonas putida</i> W619                                                                     | YP_001750059         | YP_001748529               | Pseudomonadales   |
| <i>Pseudomonas putida</i> GB-1                                                                     |                      | YP_001667918               | Pseudomonadales   |
| <i>Pseudomonas putida</i> KT2440                                                                   | NP_745961            | NP_744288                  | Pseudomonadales   |
| <i>Pseudomonas stutzeri</i> A1501                                                                  | YP_001172718         | YP_001172249               | Pseudomonadales   |
| <i>Pseudomonas syringae</i> pv. <i>phaseolicola</i> 1448A                                          | YP_274601            | YP_275367                  | Pseudomonadales   |
| <i>Pseudomonas syringae</i> pv. <i>syringae</i> B728a                                              | YP_235836            | YP_236357                  | Pseudomonadales   |
| <i>Pseudomonas syringae</i> pv. <i>tomato</i> str. <i>DC3000</i>                                   | NP_792773            | NP_793294                  | Pseudomonadales   |
| <i>Psychrobacter arcticus</i> 273-4                                                                |                      | YP_264942                  | Pseudomonadales   |
| <i>Psychrobacter cryohalolentis</i> K5                                                             | YP_580104            | YP_581162                  | Pseudomonadales   |
| <i>Psychrobacter</i> sp. <i>PRwf-1</i>                                                             | YP_001279766         | YP_001279298               | Pseudomonadales   |
| <i>Psychromonas ingrahamii</i> 37                                                                  |                      | YP_943338                  | Alteromonadales   |
| <i>Saccharophagus degradans</i> 2-40                                                               |                      | YP_527255                  | Alteromonadales   |
| <i>Salmonella enterica</i> subsp. <i>arizonae</i> serovar 62                                       |                      | YP_001570290               | Enterobacteriales |
| <i>Salmonella enterica</i> subsp. <i>enterica</i> serovar <i>Choleraesuis</i> str. <i>SC-B67</i>   |                      | YP_216698                  | Enterobacteriales |
| <i>Salmonella enterica</i> subsp. <i>enterica</i> serovar <i>Paratyphi A</i> str. <i>ATCC 9150</i> |                      | YP_150435                  | Enterobacteriales |
| <i>Salmonella enterica</i> subsp. <i>enterica</i> serovar <i>Paratyphi B</i> str. <i>SPB7</i>      |                      | YP_001587763               | Enterobacteriales |
| <i>Salmonella enterica</i> subsp. <i>enterica</i> serovar <i>Typhi</i> str. <i>CT18</i>            |                      | NP_455783                  | Enterobacteriales |

|                                                                                        |           |                      |                                          |                   |
|----------------------------------------------------------------------------------------|-----------|----------------------|------------------------------------------|-------------------|
| <i>Salmonella enterica</i> subsp. <i>enterica</i> serovar <i>Typhi</i> str. <i>Ty2</i> |           | NP_805405            | NP_807836, NP_804985                     | Enterobacteriales |
| <i>Salmonella typhimurium</i> LT2                                                      |           | NP_460673            | NP_460264                                | Enterobacteriales |
| <i>Serratia proteamaculans</i> 568                                                     |           | YP_001478886         | YP_001478947, YP_001480330, YP_001476548 | Enterobacteriales |
| <i>Shewanella amazonensis</i> SB2B                                                     |           | YP_927199            | YP_928020                                | Alteromonadales   |
| <i>Shewanella baltica</i> OS155                                                        |           | YP_001050858         | YP_001051092, YP_001041729               | Alteromonadales   |
| <i>Shewanella baltica</i> OS185                                                        |           | YP_001366689         | YP_001366950                             | Alteromonadales   |
| <i>Shewanella baltica</i> OS195                                                        |           | YP_001555037         | YP_001555256, YP_001557130               | Alteromonadales   |
| <i>Shewanella denitrificans</i> OS217                                                  |           | YP_563331            | YP_563403                                | Alteromonadales   |
| <i>Shewanella frigidimarina</i> NCIMB 400                                              |           | YP_751161            | YP_750091                                | Alteromonadales   |
| <i>Shewanella halifaxensis</i> HAW EB4                                                 |           | YP_001673830         | YP_001674850                             | Alteromonadales   |
| <i>Shewanella loihica</i> PV-4                                                         |           | YP_001094349         | YP_001094424                             | Alteromonadales   |
| <i>Shewanella oneidensis</i> MR-1                                                      |           | NP_718289            | NP_718626                                | Alteromonadales   |
| <i>Shewanella pealeana</i> ATCC 700345                                                 |           | YP_001501395         | YP_001501485                             | Alteromonadales   |
| <i>Shewanella putrefaciens</i> CN-32                                                   |           | YP_001183770         | YP_001183955                             | Alteromonadales   |
| <i>Shewanella sediminis</i> HAW-EB3                                                    |           | YP_001474576         | YP_001473397                             | Alteromonadales   |
| <i>Shewanella</i> sp. ANA-3                                                            |           | YP_869368            | YP_869126                                | Alteromonadales   |
| <i>Shewanella</i> sp. MR-4                                                             |           | YP_733719            | YP_733568                                | Alteromonadales   |
| <i>Shewanella</i> sp. MR-7                                                             |           | YP_737712            | YP_737554                                | Alteromonadales   |
| <i>Shewanella</i> sp. W3-18-1                                                          |           | YP_963149            | YP_962964                                | Alteromonadales   |
| <i>Shewanella woodyi</i> ATCC 51908                                                    |           | YP_001760182         | YP_001761342                             | Alteromonadales   |
| <i>Shigella boydii</i> Sb227                                                           |           | YP_408219            | YP_407779                                | Enterobacteriales |
| <i>Shigella dysenteriae</i> Sd197                                                      |           | YP_402982            | YP_403139                                | Enterobacteriales |
| <i>Shigella flexneri</i> 2a str. 2457T                                                 |           | NP_836967            | NP_837145                                | Enterobacteriales |
| <i>Shigella flexneri</i> 2a str. 301                                                   |           | NP_707181            | NP_707350                                | Enterobacteriales |
| <i>Shigella flexneri</i> 5 str. 8401                                                   |           | YP_688795            | YP_688950                                | Enterobacteriales |
| <i>Shigella sonnei</i> Ss046                                                           |           | YP_310776            | YP_310338                                | Enterobacteriales |
| <i>Sodalis glossinidius</i> str. 'morsitans'                                           |           | YP_455088            | YP_455041                                | Enterobacteriales |
| <i>Thiomicrospira crunogena</i> XCL-2                                                  |           | YP_390466            |                                          | Thiotrichales     |
| <i>Vibrio cholerae</i> O1 biovar <i>eltor</i> str. N16961                              |           | NP_231366            | NP_231677                                | Vibrionales       |
| <i>Vibrio cholerae</i> O395                                                            |           | YP_001217276         | YP_001217569                             | Vibrionales       |
| <i>Vibrio fischeri</i> ES114                                                           |           | YP_204434            | YP_207176, YP_205024                     | Vibrionales       |
| <i>Vibrio harveyi</i> ATCC BAA-1116                                                    |           | YP_001444771         | YP_001436068, YP_001446218               | Vibrionales       |
| <i>Vibrio parahaemolyticus</i> RIMD 2210633                                            |           | NP_797401            | NP_798528                                | Vibrionales       |
| <i>Vibrio vulnificus</i> CMCP6                                                         |           | NP_760989            | NP_761924                                | Vibrionales       |
| <i>Vibrio vulnificus</i> YJ016                                                         |           | NP_935107            | NP_933948                                | Vibrionales       |
| <i>Wigglesworthia glossinidia</i> endosymbiont of <i>Glossina brevipalpis</i>          |           |                      |                                          | Enterobacteriales |
| <i>Xanthomonas axonopodis</i> pv. <i>citri</i> str. 306                                | NP_640391 | NP_644113            | NP_642529                                | Xanthomonadales   |
| <i>Xanthomonas campestris</i> pv. <i>campestris</i> str. 8004                          | YP_241148 | YP_244885            | YP_243144                                | Xanthomonadales   |
| <i>Xanthomonas campestris</i> pv. <i>campestris</i> str. ATCC 33913                    | NP_635429 | NP_639100            |                                          | Xanthomonadales   |
| <i>Xanthomonas campestris</i> pv. <i>vesicatoria</i> str. 85-10                        | YP_361770 | YP_365663            | YP_364018, YP_364137, YP_361711          | Xanthomonadales   |
| <i>Xanthomonas oryzae</i> pv. <i>oryzae</i> KACC10331                                  | YP_198814 | YP_199218            |                                          | Xanthomonadales   |
| <i>Xanthomonas oryzae</i> pv. <i>oryzae</i> MAFF 311018                                | YP_449184 | YP_449569            |                                          | Xanthomonadales   |
| <i>Xylella fastidiosa</i> 9a5c                                                         |           | NP_061659, NP_298210 | NP_299064, NP_299339                     | Xanthomonadales   |
| <i>Xylella fastidiosa</i> M12                                                          |           | YP_001776438         | YP_001775704                             | Xanthomonadales   |
| <i>Xylella fastidiosa</i> Temecula1                                                    |           | NP_779952            |                                          | Xanthomonadales   |
| <i>Yersinia enterocolitica</i> subsp. <i>enterocolitica</i> 8081                       |           | YP_001006438         | YP_001006485                             | Enterobacteriales |
| <i>Yersinia pestis</i> Angola                                                          |           | YP_001606739         | YP_001606772                             | Enterobacteriales |
| <i>Yersinia pestis</i> Antiqua                                                         |           | YP_651488            | YP_651434                                | Enterobacteriales |
| <i>Yersinia pestis</i> biovar <i>Microtus</i> str. 91001                               |           | NP_993355            | NP_993305                                | Enterobacteriales |
| <i>Yersinia pestis</i> CO92                                                            |           | NP_405760            | NP_405710                                | Enterobacteriales |
| <i>Yersinia pestis</i> KIM                                                             |           | NP_669373            | NP_669467                                | Enterobacteriales |
| <i>Yersinia pestis</i> Nepal516                                                        |           | YP_647615            | YP_647561                                | Enterobacteriales |

*Yersinia pestis* Pestoides F  
*Yersinia pseudotuberculosis* IP 31758  
*Yersinia pseudotuberculosis* YPIII  
*Yersinia pseudotuberculosis* IP 32953

|  |              |                                        |  |                   |
|--|--------------|----------------------------------------|--|-------------------|
|  | YP_001162290 | YP_001162342                           |  | Enterobacteriales |
|  | YP_001400898 | YP_001400952,YP_001393284,YP_001393331 |  | Enterobacteriales |
|  | YP_001720773 | YP_001720827                           |  | Enterobacteriales |
|  | YP_070657    | YP_068538,YP_070608                    |  | Enterobacteriales |

**Proteobacteria**

*Magnetococcus* sp. MC-1

|  |           |           |  |              |
|--|-----------|-----------|--|--------------|
|  | YP_867551 | YP_866447 |  | unclassified |
|--|-----------|-----------|--|--------------|

**Spirochaetes**

*Borrelia afzelii* PKo  
*Borrelia burgdorferi* B31  
*Borrelia garinii* PBi  
*Leptospira borgpetersenii* serovar *Hardjo-bovis* JB197  
*Leptospira borgpetersenii* serovar *Hardjo-bovis* L550  
*Leptospira interrogans* serovar *Copenhageni* str. *Fiocruz* L1-130  
*Leptospira interrogans* serovar *Lai* str. 56601  
*Treponema denticola* ATCC 35405  
*Treponema pallidum* subsp. *pallidum* str. *Nichols*

|  |           |  |  |                 |
|--|-----------|--|--|-----------------|
|  | YP_710281 |  |  | Spirochaetaceae |
|  | NP_212962 |  |  | Spirochaetaceae |
|  | YP_073267 |  |  | Spirochaetaceae |
|  | YP_800587 |  |  | Leptospiraceae  |
|  | YP_797709 |  |  | Leptospiraceae  |
|  | YP_002014 |  |  | Leptospiraceae  |
|  | NP_711902 |  |  | Leptospiraceae  |
|  | NP_971815 |  |  | Spirochaetaceae |
|  | NP_218834 |  |  | Spirochaetaceae |

**Thermotogae**

*Fervidobacterium nodosum* Rt17-B1  
*Petrogoga mobilis* SJ95  
*Thermosipho melanesiensis* BI429  
*Thermotoga lettingae* TMO  
*Thermotoga maritima* MSB8  
*Thermotoga petrophila* RKU-1

|  |              |  |              |                |
|--|--------------|--|--------------|----------------|
|  | YP_001410533 |  | YP_001410867 | Thermotogaceae |
|  | YP_001568661 |  |              | Thermotogaceae |
|  | YP_001306270 |  |              | Thermotogaceae |
|  | YP_001469829 |  |              | Thermotogaceae |
|  | NP_228071    |  | NP_227988    | Thermotogaceae |
|  | YP_001244262 |  | YP_001244347 | Thermotogaceae |
